# Supplementary material for: Te/SnS2 tunneling heterojunctions as high-performance photodetectors with superior self-powered properties
Source: Royal Society of Chemistry journal article supplement (doi:10.1039/d2na00507g), 2022-01-01
Supplement: d2na00507g1.pdf [file d2na00507g1.pdf]

## Supporting Information

### **Te/SnS<sub>2</sub> Tunnelling Heterojunctions as High-performance Photodetector with Superior Self-powered Properties**

*Xuanhao Cao, Zehong Lei, Shuting Zhao, Lili Tao, Zhaoqiang Zheng, Xing Feng, Jingbo Li and Yu Zhao\**

X. Cao, Z. Lei, S. Zhao, Dr. L. Tao, Dr. Z. Zheng, Prof. X. Feng, Prof. Y. Zhao

Guangdong Provincial Key Laboratory of Information Photonics Technology, Guangdong Provincial Key Laboratory of Functional Soft Condensed Matter, School of Material and Energy, Guangdong University of Technology, Guangzhou 510006, China

E-mail: zhaoyu@gdut.edu.cn

Prof. J. Li

Guangdong Key Lab of Chip and Integration Technology, Institute of Semiconductors, South China Normal University, Guangzhou 510631, P.R. China

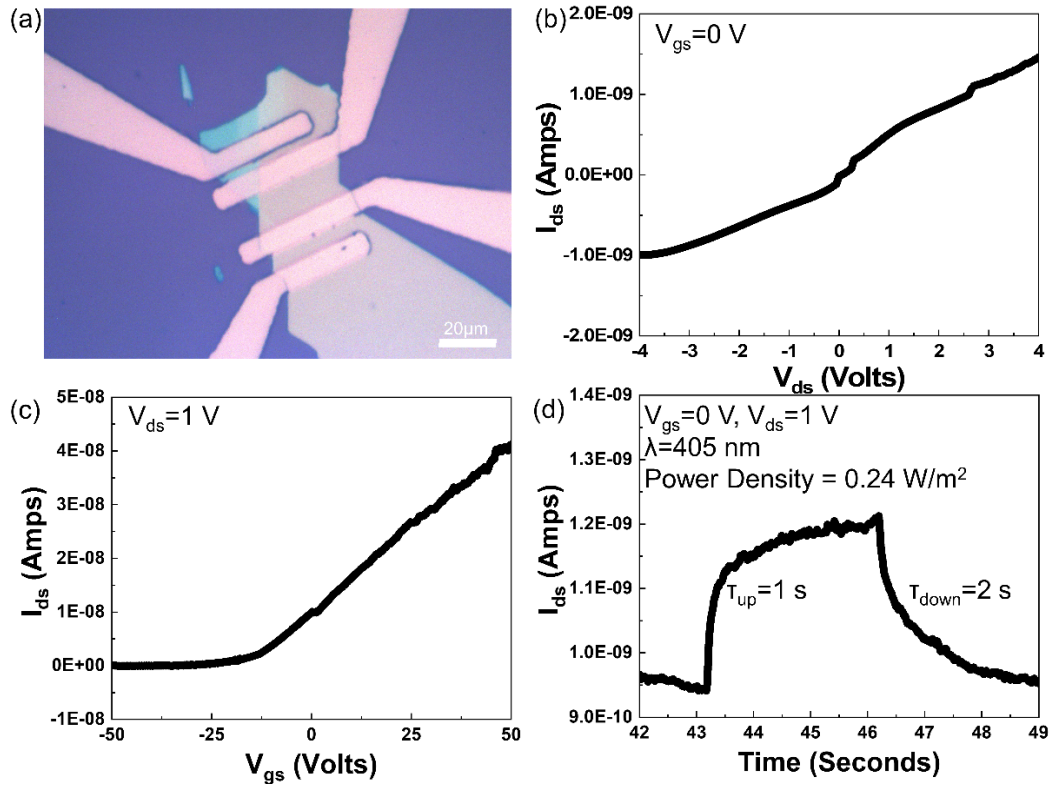

**Figure S1.** (a) The optical image of SnS<sub>2</sub> device. (b) The  $I_{ds}$ – $V_{ds}$  curve of the SnS<sub>2</sub> device at  $V_g = 0$  V. (c) The transfer ( $I_{ds}$ – $V_{gs}$ ) curve of the SnS<sub>2</sub> device at  $V_{ds}=1$  V. (d) The photoresponse of the SnS<sub>2</sub> device at  $V_{ds}=1$  V and  $V_g=0$  V under the irradiation of 405 nm.

The effective channel area of the SnS<sub>2</sub> device is about 201 μm<sup>2</sup>, and  $R=5.21$  A/W can be calculated by Equation

$$R_{\lambda} = \frac{\Delta I_{ph}}{P_{\lambda} S}$$

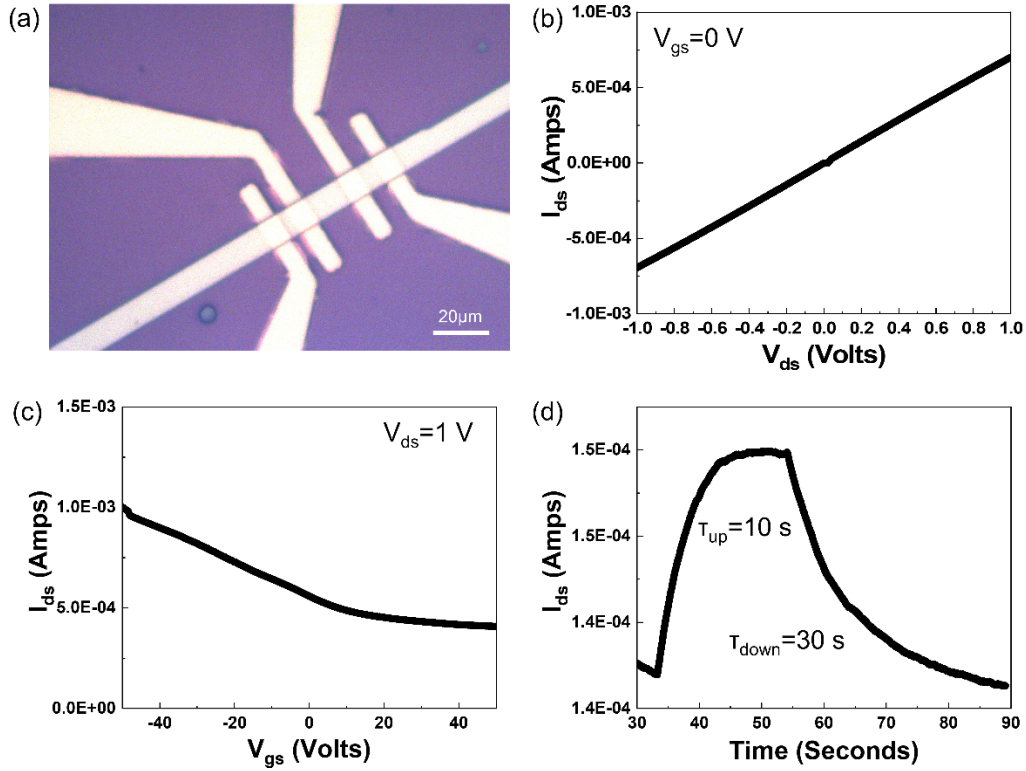

**Figure S2.** (a) The optical image of Te device. (b) The  $I_{ds}$ - $V_{ds}$  curve of the Te device at  $V_g = 0$  V. (c) The transfer ( $I_{ds}$ - $V_{gs}$ ) curve of the Te device at  $V_{ds}=1$  V. (d) The photoresponse of the Te device at  $V_{ds}=1$  V and  $V_g=0$  V under the irradiation of 405 nm.

The effective channel area of the Te device is about  $71 \mu\text{m}^2$ , and  $R=130$  A/W.

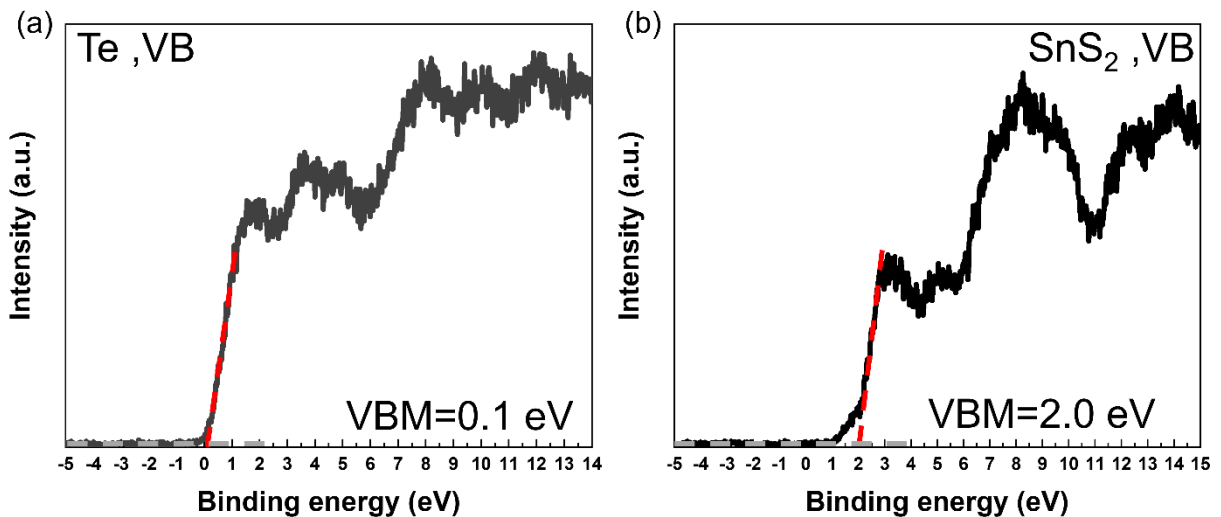

**Figure S3.** X-ray photoelectron spectroscopy of (a) Te and (b)  $\text{SnS}_2$ . The intercept of X axis indicates the energy level of valence-band maximum (VBM) with respect to Fermi level of the probe that has work functions of 4.28 eV. Therefore, the VBM of Te and  $\text{SnS}_2$  is -4.38 and -6.28 eV with respect to vacuum level, respectively.

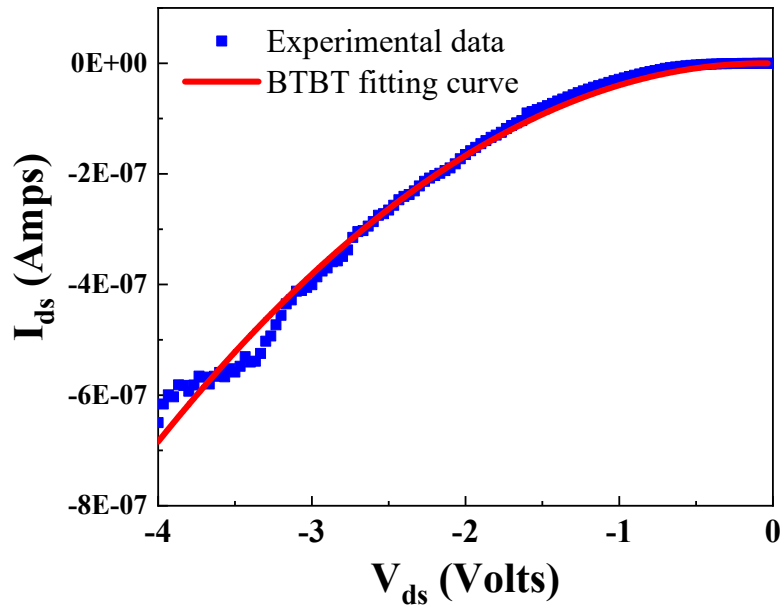

**Figure S4.** The reverse I-V curve is fitted using the theoretical relation  $I = C_1 V^2 \exp\left(\frac{C_2}{V}\right)$  given in the previous literature (S. M. Sze, K. K. Ng, *Physics of Semiconductor Devices*, John Wiley & Sons, Hoboken, New Jersey, USA 2006). The experimental result is fitted well and give the

relation  $I = -4.38 \times 10^{-8} \times V^2 \exp\left(\frac{-0.097}{V}\right)$  with  $R^2=0.992$ , confirming the tunneling mechanism of the electron transport under reverse bias.

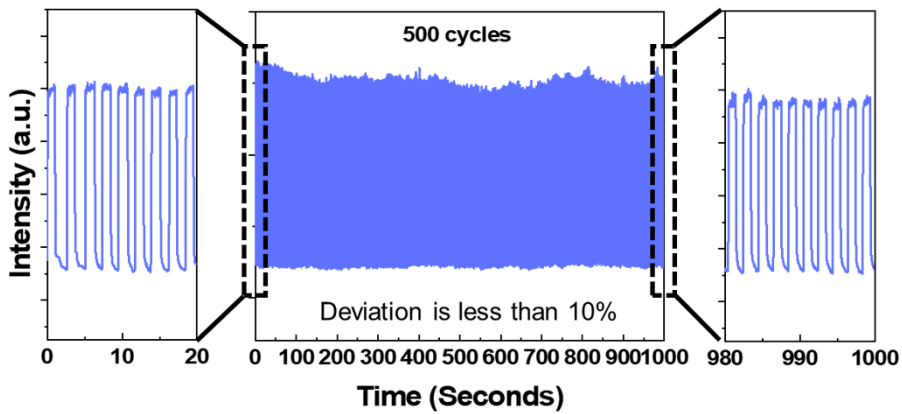

**Figure S5.** The photoresponse of the Te/SnS<sub>2</sub> heterojunction for 500 continuous cycles of irradiation (405 nm laser).

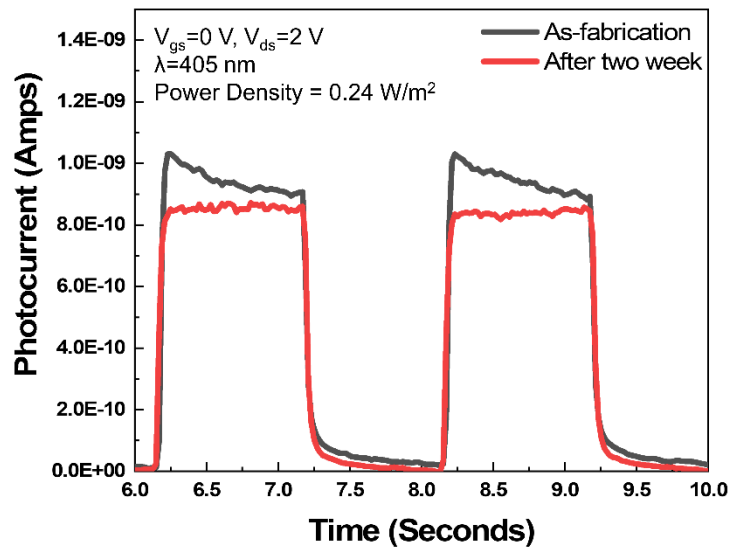

**Figure S6.** Photoresponses of Te/SnS<sub>2</sub> heterojunctions as fresh one and that after two weeks.

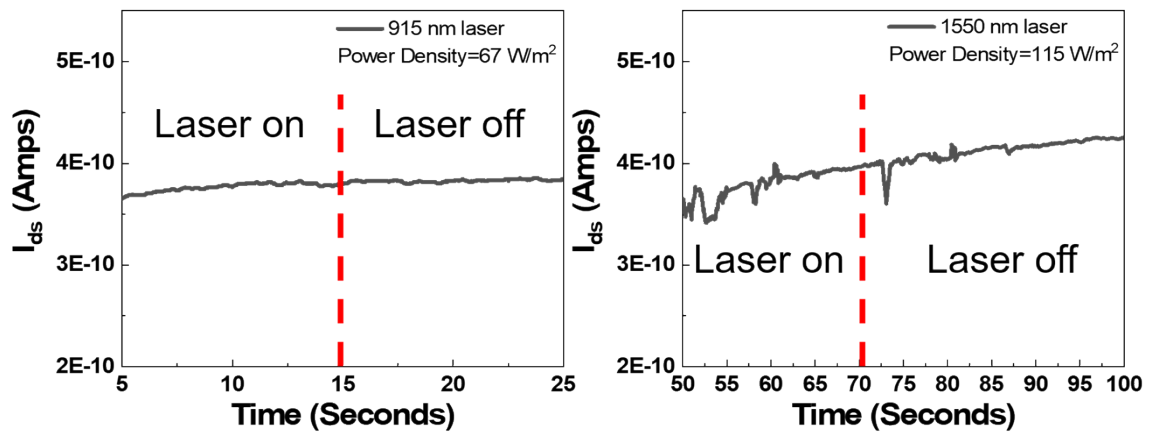

**Figure S7.** The measured current of Te/SnS<sub>2</sub> heterojunction under the irradiation of 915 and 1550 nm laser.

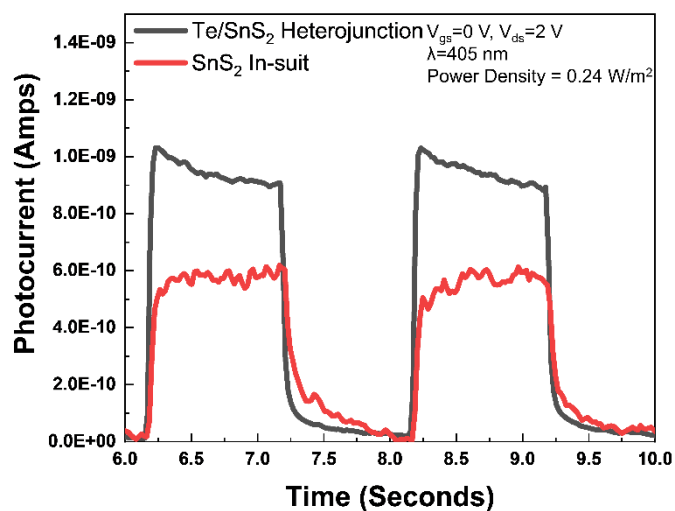

**Figure S8.** The responding photocurrent of Te/SnS<sub>2</sub> heterojunction and its constituent SnS<sub>2</sub>.

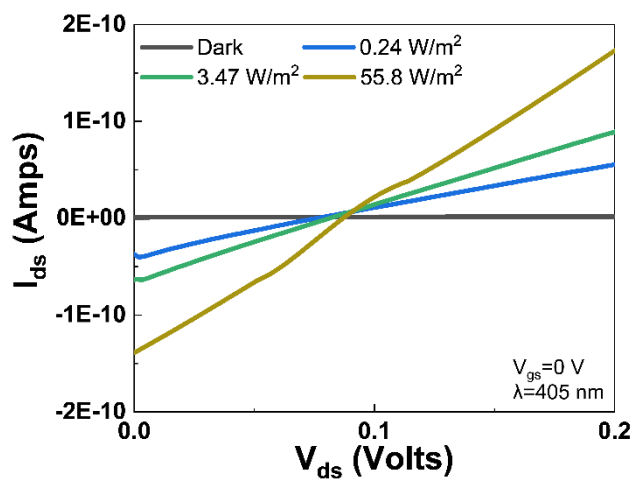

**Figure S9.** I–V curves of the Te/SnS<sub>2</sub> heterojunction device measured under light illumination of 405 nm with varied light intensities.

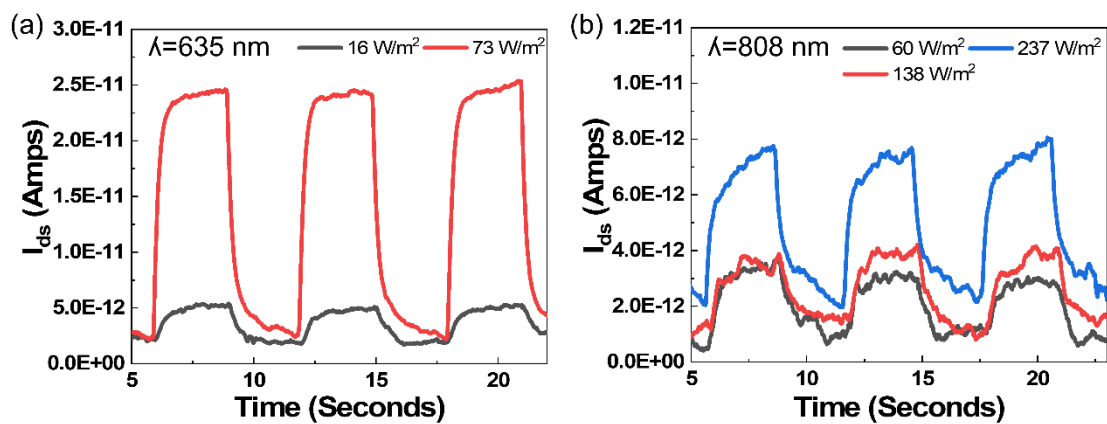

**Figure S10.** Photoresponse of the heterostructure device under zero bias with (a) 635 nm and (b) 808 nm laser irradiation

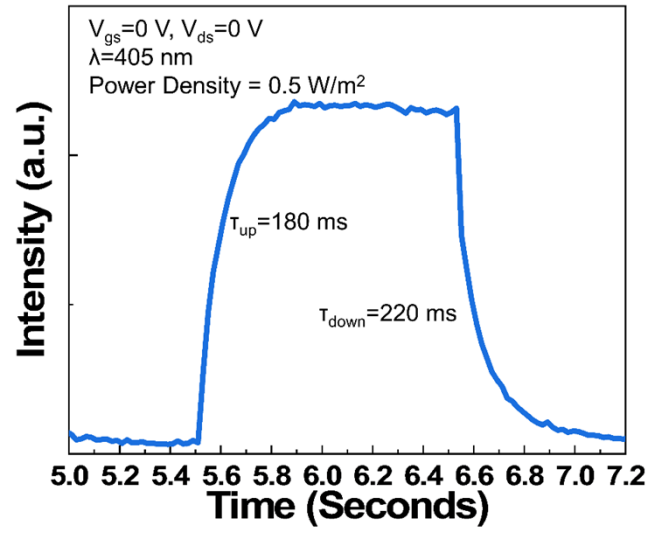

**Figure S11.** Photoresponse of the heterostructure device under zero bias and 405nm laser irradiation
